# Supplementary material for: Physical Activity Trajectories and Functional Recovery After Acute Stroke Among Adults in Sweden
Source: PubMed Central journal article supplement (PMC10152305; doi:10.1001/jamanetworkopen.2023.10919), 2023-05-01
Supplement: jamanetwopen-e2310919-s002.pdf [file jamanetwopen-e2310919-s002.pdf]

## Data Sharing Statement

Buvarp. Physical Activity Trajectories and Functional Recovery After Acute Stroke Among Adults in Sweden. *JAMA Netw Open*. Published May 01, 2023.

doi:10.1001/jamanetworkopen.2023.10919

### Data

**Data available:** No

### Additional Information

**Explanation for why data not available:** Data may be available to researchers upon request, after a review of the secrecy. According to Swedish regulations (<https://etikprovningmyndigheten.se/>), permission to use data can only be based on application and approval from the Swedish Ethics Review Authority.
